# Supplementary material
Source: PubMed Central journal article supplement (PMC2813367)
Supplement: NIHMS157644-supplement-02.pdf [file NIHMS157644-supplement-02.pdf]

**Supplementary Table 2**

**Liquid culture assay results for LPhP variants in Figure 3B,C and fold-change calculations**

| LPhP variants                    | mut (-) Ad |                             | no mut (-) Ad |         | fold-change (-) Ad |         | mut (+) Ad |         | no mut (+) Ad |         | fold-change (+) Ad |         |  |
|----------------------------------|------------|-----------------------------|---------------|---------|--------------------|---------|------------|---------|---------------|---------|--------------------|---------|--|
|                                  | mean       | std dev                     | mean          | std dev |                    | std dev | mean       | std dev | mean          | std dev |                    | std dev |  |
| 57-61 +/- 48                     | 35         | 6.9                         | 110           | 31      | 3.1                | 1.1     | 6.3        | 2.9     | 73            | 10      | 12                 | 5.6     |  |
| 55/57-61 +/- 48                  | 11         | 2.3                         | 170           | 40      | 15                 | 4.9     | 3.3        | 1.1     | 14            | 2.7     | 4.2                | 1.6     |  |
| 51/57-61 +/- 48                  | 590        | 54                          | 880           | 150     | 1.5                | 0.3     | 190        | 35      | 430           | 92      | 2.3                | 0.6     |  |
| 54/55/57-61 +/- 48               | 46         | 9.9                         | 530           | 180     | 12                 | 4.6     | 10         | 4.7     | 160           | 16      | 16                 | 7.7     |  |
| LLhP I48S                        | 100        | 35                          | 15            | 6.7     | -6.7               | 3.8     | 23         | 8.9     | 6.3           | 1.8     | -3.7               | 1.8     |  |
| 48/51/54/55/57-61 +/- 50         | 11         | 2.4                         | 140           | 47      | 13                 | 5.1     | 2.5        | 0.7     | 27            | 17      | 11                 | 7.4     |  |
| LLhP N50S                        | 190        | 24                          | 15            | 6.7     | -13                | 5.9     | 68         | 11      | 6.3           | 1.8     | -1.1               | 3.5     |  |
| 57-61 +/- 51                     | 880        | 150                         | 110           | 31      | -8.0               | 2.6     | 430        | 92      | 73            | 10      | -5.9               | 1.5     |  |
| 48/57-61 +/- 51                  | 590        | 54                          | 35            | 6.9     | -17                | 3.7     | 190        | 35      | 6.3           | 2.9     | -30                | 15      |  |
| 48/55/57-61 +/- 51               | 330        | 120                         | 11            | 2.3     | -30                | 13      | 110        | 58      | 3.3           | 1.1     | -33                | 21      |  |
| 48/54/55/57-61 +/- 51            | 140        | 47                          | 46            | 9.9     | -3.0               | 1.2     | 27         | 17      | 10            | 4.7     | -2.7               | 2.1     |  |
| LLhP R51A                        | 690        | 140                         | 15            | 6.7     | -46                | 23      | 950        | 150     | 6.3           | 1.8     | -150               | 49      |  |
| 57-61 +/- 54                     | 460        | 120                         | 110           | 31      | -4.2               | 1.6     | 290        | 61      | 73            | 10      | -4.0               | 1.0     |  |
| 55/57-61 +/- 54                  | 530        | 180                         | 170           | 40      | -3.1               | 1.3     | 160        | 16      | 14            | 2.7     | -11                | 2.5     |  |
| 48/55/57-61 +/- 54               | 46         | 9.9                         | 11            | 2.3     | -4.2               | 1.3     | 10         | 4.7     | 3.3           | 1.1     | -3.0               | 1.7     |  |
| LLhP Q54R                        | 100        | 15                          | 15            | 6.7     | -6.7               | 3.1     | 19         | 9.5     | 6.3           | 1.8     | -3.0               | 1.7     |  |
| 57-61 +/- 55                     | 170        | 40                          | 110           | 31      | -1.5               | 0.6     | 14         | 2.7     | 73            | 10      | 5.2                | 1.2     |  |
| 48/57-61 +/- 55                  | 11         | 2.3                         | 35            | 6.9     | 3.2                | 0.9     | 3.3        | 1.1     | 6.3           | 2.9     | 1.9                | 1.1     |  |
| 48/51/57-61 +/- 55               | 330        | 120                         | 590           | 54      | 1.8                | 0.7     | 110        | 58      | 190           | 35      | 1.7                | 1.0     |  |
| 54/57-61 +/- 55                  | 530        | 180                         | 460           | 120     | -1.2               | 0.5     | 160        | 16      | 290           | 61      | 1.8                | 0.4     |  |
| LLhP Q55S                        | 200        | 39                          | 15            | 6.7     | -13                | 6.5     | 55         | 17      | 6.3           | 1.8     | -8.7               | 3.7     |  |
| 48/54/55/57-61 +/- 46            | 140        | 13                          | 46            | 9.9     | -3.0               | 0.7     | 49         | 22      | 10            | 4.7     | -4.9               | 3.2     |  |
| 48/50/54/55/57-61 +/- 46         | 690        | 140                         | 560           | 64      | -1.2               | 0.3     | 950        | 150     | 350           | 95      | -2.7               | 0.9     |  |
| LLhP N46H                        | 11         | 2.4                         | 15            | 6.7     | 1.4                | 0.7     | 2.5        | 0.7     | 6.3           | 1.8     | 2.5                | 1.0     |  |
| <i>Data not shown in figures</i> |            |                             |               |         |                    |         |            |         |               |         |                    |         |  |
| 48/55/57/58/59/61                | 660        | 110 (no detectable protein) |               |         |                    |         | 540        | 160     |               |         |                    |         |  |
| 48/55/57/58/60/61                | 310        | 170                         |               |         |                    |         | 160        | 150     |               |         |                    |         |  |

"Ad" is adenine, which is metabolized to co-repressor hypoxanthine.

**Fold-change calculations for Figure 3B, C**

Positive values indicate enhanced repression and are calculated as the ratio of [no substitution]/[+ substitution].

Negative values indicate diminished repression and are calculated as the ratio of [+substitution]/[no substitution].
